# Supplementary material for: Engineering of a keto acid reductase through reconstructing the substrate binding pocket to improve its activity
Source: Royal Society of Chemistry journal article supplement (doi:10.1039/c8cy02586j), 2019-01-01
Supplement: c8cy02586j1.pdf [file c8cy02586j1.pdf]

### Supplementary Information

Table.S1 all of the PCR primers used for construction of mutants

| Round        | Primer name | Nucleotide sequence                  |
|--------------|-------------|--------------------------------------|
| First-round  | L127-F      | GTGTTAC <u>CNNNT</u> GGACCTCTTCTCTGG |
|              | L127-R      | GAGGTCC <u>ANNNG</u> GTAACACCAGCAAC  |
|              | T129-F      | CCCTGTGG <u>NNNT</u> CTTCTCTGGTTA    |
|              | T129-R      | CAGAGAAG <u>ANNN</u> CCACAGGGTAAC    |
|              | L244-F      | CTGTCTCGT <u>NNN</u> CTGAAACCGG      |
|              | L244-R      | GTTTCAG <u>NNN</u> ACGAGACAGGTCAG    |
|              | A250-F      | GAAAAC <u>NNNG</u> GTAACCACTACCCG    |
|              | A250-R      | GTTAC <u>CNNNG</u> TTTTCCGGTTTCAG    |
|              | L245-F      | CGTGGT <u>NNN</u> AAACCGGAAAAC       |
|              | L245-R      | CGGTTT <u>NNN</u> ACCACGAGACAG       |
| Second-round | L127I-F     | GGTGTAC <u>CATTT</u> GGACCTCTTCTCTGG |
|              | L127I-R     | GAGGTCC <u>AAATG</u> GTAACACCAGCAAC  |
|              | L244G-F     | GTCTCGT <u>GGT</u> CTGAAACCGG        |
|              | L244G-R     | GTTTCAG <u>ACC</u> ACGAGACAGGTC      |
|              | A250G-F     | GGAAAAC <u>CGGT</u> GGTAACCACTAC     |
|              | A250G-R     | GTTACC <u>ACCG</u> TTTTCCGGTTTC      |
| Third-round  | L245-F      | CGTGGT <u>NNN</u> AAACCGGAAAAC       |
|              | L245-R      | CGGTTT <u>NNN</u> ACCACGAGACAG       |
|              | L245R-F     | CGTGGT <u>CCG</u> AAACCGGAAAAC       |
|              | L245R-R     | CGGTTT <u>CGG</u> ACCACGAGACAG       |

Table S2 Comparison of Asymmetric reduction of OPBA to (R)-HPBA through bio-reduction with the reported works

| Enzyme                                                | Product (mM) | Productivity (mM·h <sup>-1</sup> ) | <i>ee<sub>p</sub></i> (%) | references |
|-------------------------------------------------------|--------------|------------------------------------|---------------------------|------------|
| D-LDH from <i>Staphylococcus epiderimidis</i> and FDH | 182          | 38.2                               | >99                       | [3]        |
| D-LDH (EC 1.1.1.28) and FDH                           | 56.7         | 49.9                               | No report                 | [26]       |
| YiaE from <i>E. Coli</i> K12 and GDH                  | 100          | 4.2                                | 98                        | [27]       |
| LDH from <i>Lactobacillus bulgaricus</i> and FDH      | 71.8         | 47.9                               | >99                       | [28]       |
| D-MDH from <i>Enterococcus faecali</i> and GDH        | 224          | 85.7                               | >99                       | This study |

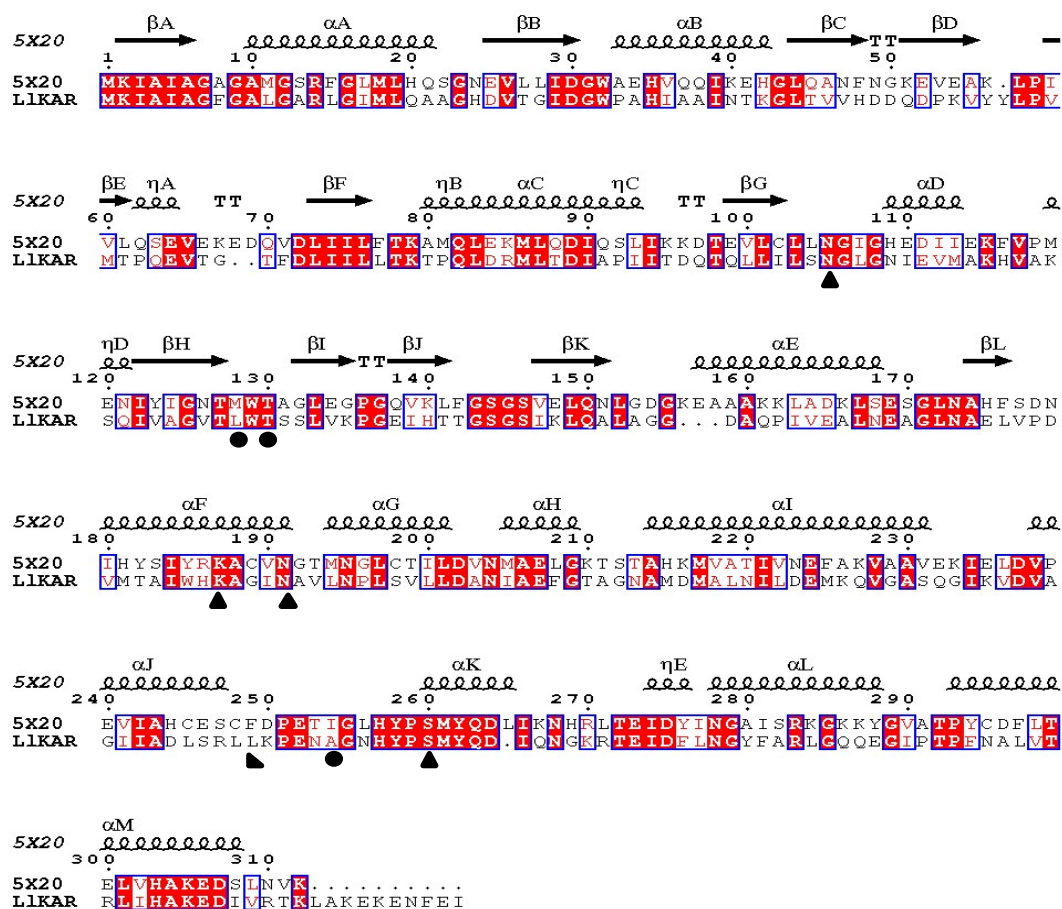

**Figure S1.** Structure-related sequence alignment between *L/KAR* and its close homologue: D-mandelate dehydrogenases (D-MDH) from *Leuconostoc lactis*. The homologue of *L/KAR*, D-mandelate dehydrogenases (D-MDH) with a PDB code of 5X20, 3WFI and 3WFJ, was identified by performing a BLASTP search, and the alignment was carried out using the program ClustalW. The sequence alignment was subsequently visualized using ESPrpt 3.2. Above the alignments are elements of the secondary structure of 5X20. The numbering shown is from 5X20. Triangles, critical coenzyme binding residues; stars, putative catalytic residues located at the corresponding positions of the conserved catalytic residues Asn104, Asn183, and Glu263. Strictly conserved residues are highlighted with red boxes.

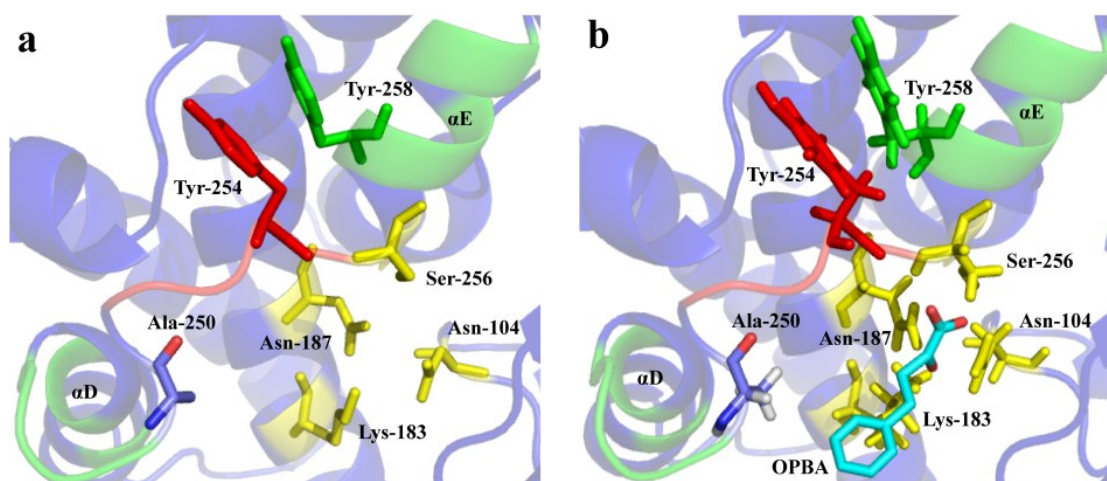

**Figure S2.** The clear spatial structure of the *L/KAR* catalytic and binding pocket. (a) The catalytic tetrad, Asn187, Lys183, and Ser256 are shown in yellow sticks. And the hydrophilic domains are shown in green and red cartoon; (b) the clear Spatial structure-activity relationship between  $\alpha$ -helices and loop  $\alpha$ D- $\alpha$ E. OPBA are shown as cyan sticks. All of the  $\alpha$ -helices,  $\beta$ -sheets and loops are shown in blue cartoon.

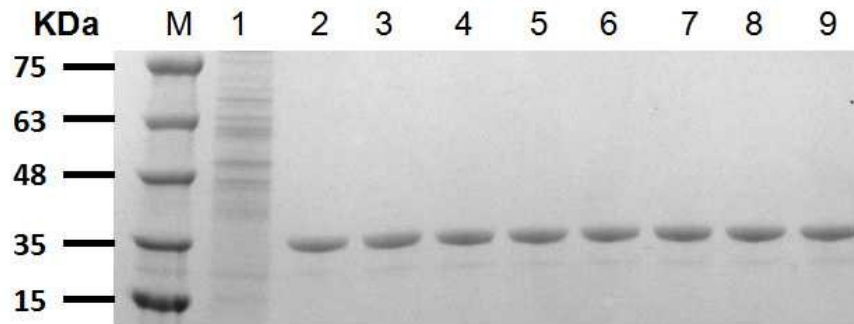

**Figure S3** SDS-PAGE analysis of the wild-type *L/KAR* and its mutants. 10  $\mu$ L sample which contained approximately 40  $\mu$ g protein was loaded for each lane. Lane M: protein marker; Lane 1: the supernatant of the recombination *E.coli* BL21 ( harboring pET-28b); Lane 2: the purified wild-type *L/KAR*; Lane 3: the purified mut-L127I; Lane 4: the purified mut-L244G; Lane 5: the purified mut-A250G; Lane 6: the purified mut-L127I/L244G; Lane 7: the purified mut-L127I/A250G; Lane 8: the purified mut-L244G/A250G; Lane 9: the purified mut-L244G/A250G/L245R.

## References

3. E. Schmidt, O. Ghisalba, D. Gyga and G. Sedelmeier, *Journal of Biotechnology*, 1992, **24**, 315-327.
26. Y. Bai and S. T. Yang, *Biotechnology and Bioengineering*, 2005, **92**, 137-146.
27. H. Yun, H. L. Choi, N. W. Fadnavis and B. G. Kim, *Biotechnology Progress*, 2005, **21**, 366-371.
28. B. Sheng, Z. Zheng, M. Lv, H. Zhang, T. Qin, C. Gao, C. Ma and P. Xu, *PloS One*, 2014, **9**, e104204-e104209.
